# Supplementary material
Source: Elsevier journal article supplement (https://comptes-rendus.academie-sciences.fr/chimie/article/10.1016/j.crci.2010.02.003/file/attach/mmc1.pdf)
Supplement: mmc1 [file mmc1.pdf]

## Supporting Information

**X-ray Data Collection, Structure Solution, and Refinement of  $[\eta^5:\kappa^1\text{-C}_5\text{Me}_4\text{SiMe}_2\text{CH}_2\text{C}(\text{Bu})\text{N}]_2\text{U}$ , 2.** A red crystal of approximate dimensions 0.07 x 0.14 x 0.52 mm was mounted on a glass fiber and transferred to a Bruker SMART APEX II diffractometer. The APEX2<sup>1</sup> program package was used to determine the unit-cell parameters and for data collection (25 sec/frame scan time for a sphere of diffraction data). The raw frame data was processed using SAINT<sup>2</sup> and SADABS<sup>3</sup> to yield the reflection data file. Subsequent calculations were carried out using the SHELXTL<sup>4</sup> program. The diffraction symmetry was  $2/m$  and the systematic absences were consistent with the monoclinic space group  $P2_1/c$  that was later determined to be correct. The structure was solved by direct methods and refined on  $F^2$  by full-matrix least-squares techniques. The analytical scattering factors<sup>5</sup> for neutral atoms were used throughout the analysis. Hydrogen atoms were included using a riding model. At convergence,  $wR2 = 0.0510$  and  $\text{Goof} = 1.028$  for 370 variables refined against 8250 data ( $0.76\text{\AA}$ ),  $R1 = 0.0202$  for those 7297 data with  $I > 2.0\sigma(I)$ .

**X-ray Data Collection, Structure Solution, and Refinement of  $(\text{C}_5\text{Me}_4\text{SiMe}_3)_2\text{U}(\text{C}\equiv\text{CPh})_2$ , 4.** A red crystal of approximate dimensions 0.04 x 0.13 x 0.26 mm was mounted on a glass fiber and transferred to a Bruker SMART APEX II diffractometer. The APEX2<sup>1</sup> program package was used to determine the unit-cell parameters and for data collection (20 sec/frame scan time for a sphere of diffraction data). The raw frame data was processed using SAINT<sup>2</sup> and SADABS<sup>3</sup> to yield the reflection data file. Subsequent calculations were carried out using the SHELXTL<sup>4</sup> program. There were no systematic absences nor any diffraction symmetry other than the Friedel condition. The centrosymmetric triclinic space group  $P\bar{1}$  was assigned

and later determined to be correct. The structure was solved by direct methods and refined on  $F^2$  by full-matrix least-squares techniques. The analytical scattering factors<sup>5</sup> for neutral atoms were used throughout the analysis. Hydrogen atoms were included using a riding model. At convergence,  $wR2 = 0.0473$  and  $Goof = 1.048$  for 402 variables refined against 8689 data ( $0.76\text{\AA}$ ),  $R1 = 0.0191$  for those 8094 data with  $I > 2.0\sigma(I)$ .

**Table 1.** X-ray Data Collection Parameters for  $[\eta^5:\kappa^1\text{-C}_5\text{Me}_4\text{SiMe}_2\text{CH}_2\text{C}(\text{tBu})\text{N}]_2\text{U}$ , **2** and  $(\text{C}_5\text{Me}_4\text{SiMe}_3)_2\text{U}(\text{C}\equiv\text{CPh})_2$ , **4**.

| Empirical Formula                         | <b>2</b>                                                  | <b>4</b>                                        |
|-------------------------------------------|-----------------------------------------------------------|-------------------------------------------------|
|                                           | $\text{C}_{34}\text{H}_{58}\text{N}_2\text{Si}_2\text{U}$ | $\text{C}_{40}\text{H}_{52}\text{Si}_2\text{U}$ |
| Formula weight                            | 789.03                                                    | 827.03                                          |
| Temperature (K)                           | 153(2) K                                                  | 153(2) K                                        |
| Crystal system                            | Monoclinic                                                | Triclinic                                       |
| Space Group                               | $P2_1/c$                                                  | $P\bar{1}$                                      |
| a ( $\text{\AA}$ )                        | 14.345(4)                                                 | 9.9155(4)                                       |
| b ( $\text{\AA}$ )                        | 14.466(4)                                                 | 10.5054(4)                                      |
| c ( $\text{\AA}$ )                        | 17.331(5)                                                 | 18.6237(7)                                      |
| $\alpha$ (deg)                            | 90                                                        | 89.5796(5)                                      |
| $\beta$ (deg)                             | 98.946(3)                                                 | 84.8150(5)                                      |
| $\gamma$ (deg)                            | 90                                                        | 74.9561(5)                                      |
| Volume ( $\text{\AA}^3$ )                 | 3552.8(16)                                                | 1865.55(13)                                     |
| Z                                         | 4                                                         | 2                                               |
| $\rho_{\text{calcd}}$ ( $\text{Mg/m}^3$ ) | 1.475                                                     | 1.472                                           |
| $\mu$ ( $\text{mm}^{-1}$ )                | 4.660                                                     | 4.440                                           |

|                                                |        |        |
|------------------------------------------------|--------|--------|
| R1 <sup>a</sup> (I $\square$ 2.0 $\sigma$ (I)) | 0.0202 | 0.0191 |
| wR2 <sup>b</sup> (all data)                    | 0.0510 | 0.0473 |

**Table 2.** Selected bond distances (Å) and angles (deg) for  $[\eta^5:\kappa^1\text{-C}_5\text{Me}_4\text{SiMe}_2\text{CH}_2\text{C}(\text{tBu})\text{N}]_2\text{U}$ , **2**.

| Bond Distances and Angles                                     | <b>2</b>  |
|---------------------------------------------------------------|-----------|
| U1-(C1-C5) <sub>centroid</sub>                                | 2.473     |
| U1-(C18-C22) <sub>centroid</sub>                              | 2.482     |
| U1-N1                                                         | 2.173(2)  |
| U1-N2                                                         | 2.173(2)  |
| N1-C13                                                        | 1.264(3)  |
| N2-C30                                                        | 1.268(3)  |
| (C1-C5) <sub>centroid</sub> -U1-(C18-C22) <sub>centroid</sub> | 139.7     |
| (C1-C5) <sub>centroid</sub> -U1-N1                            | 100.7     |
| U1-N1-C13                                                     | 152.64(2) |
| U1-N2-C30                                                     | 152.47(2) |
| N1-U1-N2                                                      | 110.06(7) |

**Table 3.** Selected bond distances (Å) and angles (deg) for  $(\text{C}_5\text{Me}_4\text{SiMe}_3)_2\text{U}(\text{C}\equiv\text{CPh})_2$ , **4**.

| Bond Distances and Angles        | <b>4</b> |
|----------------------------------|----------|
| U1-(C1-C5) <sub>centroid</sub>   | 2.448    |
| U1-(C13-C17) <sub>centroid</sub> | 2.451    |
| U1-C25                           | 2.390(2) |
| U1-C33                           | 2.369(3) |

|                                                               |           |
|---------------------------------------------------------------|-----------|
| C25-C26                                                       | 1.214(3)  |
| (C1-C5) <sub>centroid</sub> -U1-(C13-C17) <sub>centroid</sub> | 143.8     |
| (C1-C5) <sub>centroid</sub> -U1-C25                           | 104.0     |
| C25-U1-C33                                                    | 101.39(9) |

---

## References

1. APEX2 Version 2.2-0 Bruker AXS, Inc.; Madison, WI 2007.
  2. SAINT Version 7.46a, Bruker AXS, Inc.; Madison, WI 2007.
  3. Sheldrick, G. M. SADABS, Version 2008/1, Bruker AXS, Inc.; Madison, WI 2008.
  4. Sheldrick, G. M. SHELXTL, Version 6.12, Bruker AXS, Inc.; Madison, WI 2001.
  5. International Tables for X-Ray Crystallography 1992, Vol. C., Dordrecht: Kluwer Academic Publishers.
- 

## Definitions:

$$wR2 = [\Sigma[w(F_o^2 - F_c^2)^2] / \Sigma[w(F_o^2)^2]]^{1/2}$$

$$R1 = \Sigma||F_o| - |F_c|| / \Sigma|F_o|$$

Goof = S =  $[\Sigma[w(F_o^2 - F_c^2)^2] / (n-p)]^{1/2}$  where n is the number of reflections and p is the total number of parameters refined.

The thermal ellipsoid plot is shown at the 50% probability level.
